# Supplementary material
Source: Springer Nature journal article supplement (https://www.springermedizin.de/resource/supplementary/12875_2012_842_MOESM1_ESM.pdf/9435636)

## Parameter 1

Average number of days

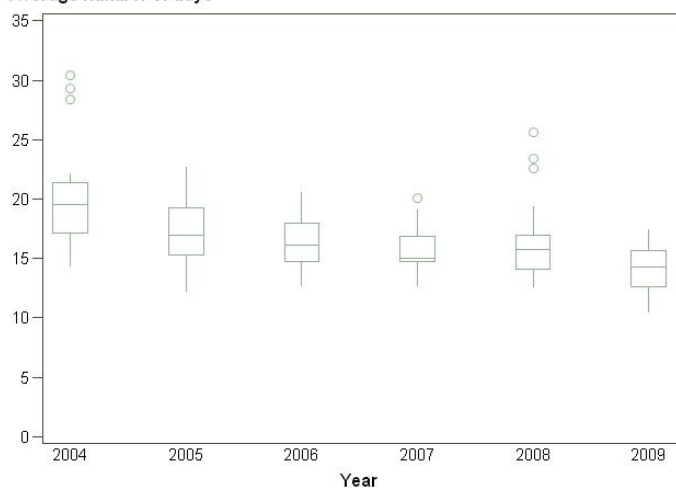

## Parameter 6

Percent

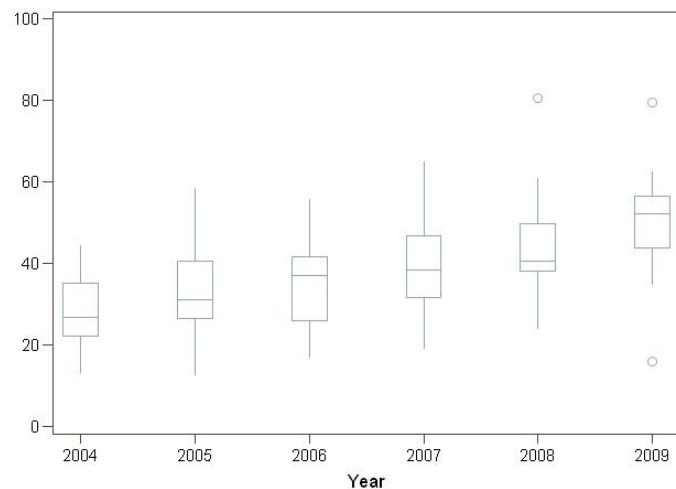

## Parameter 7

Percent

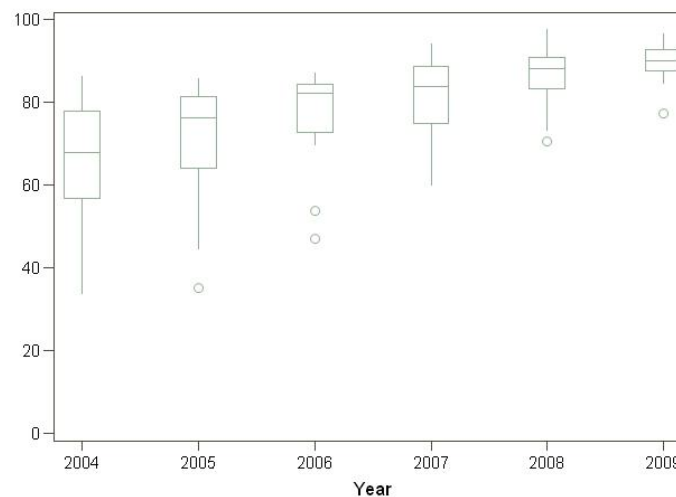

Supplement: MOESM1 [file 9435636]
